# Supplementary material for: Sequencing of glycosaminoglycans with potential to interrogate sequence-specific interactions
Source: PubMed Central journal article supplement (PMC5665995; doi:10.1038/s41598-017-15009-0), 2017-11-01

## **Supplementary Information**

### **Sequencing of glycosaminoglycans with potential to interrogate sequence-specific interactions**

Toin H. van Kuppevelt<sup>1</sup>, Arie Oosterhof, Elly M.M. Versteeg<sup>1</sup>, Emina Podhumljak<sup>1</sup>, Els M.A. van de Westerlo<sup>1</sup>, Willeke F. Daamen<sup>1</sup>

<sup>1</sup>Department of Biochemistry, Radboud Institute for Molecular Life Sciences, Radboud university medical center, PO Box 9101, 6500 HB Nijmegen, The Netherlands

## Supplementary Fig. 1.

### General characteristics of the bikunin preparation used.

- SDS-PAGE of bikunin (right lane) showing an apparent molecular weight of about 32 kDa (Coomassie Blue staining). Left lane: molecular weight markers.
- PAGE of bikunin before (left lane) and after (right lane) alkaline  $\beta$ -elimination (Alcian Blue/silver staining).
- RP-HPLC disaccharide analysis of chondroitin sulfate derived from bikunin (chondroitinase ABC digestion, AMAC-labeling, lower panel). Note the presence of  $\Delta$ UA-GalNAc and  $\Delta$ UA-GalNAc4S disaccharides. Reference disaccharides are given in the upper panel.

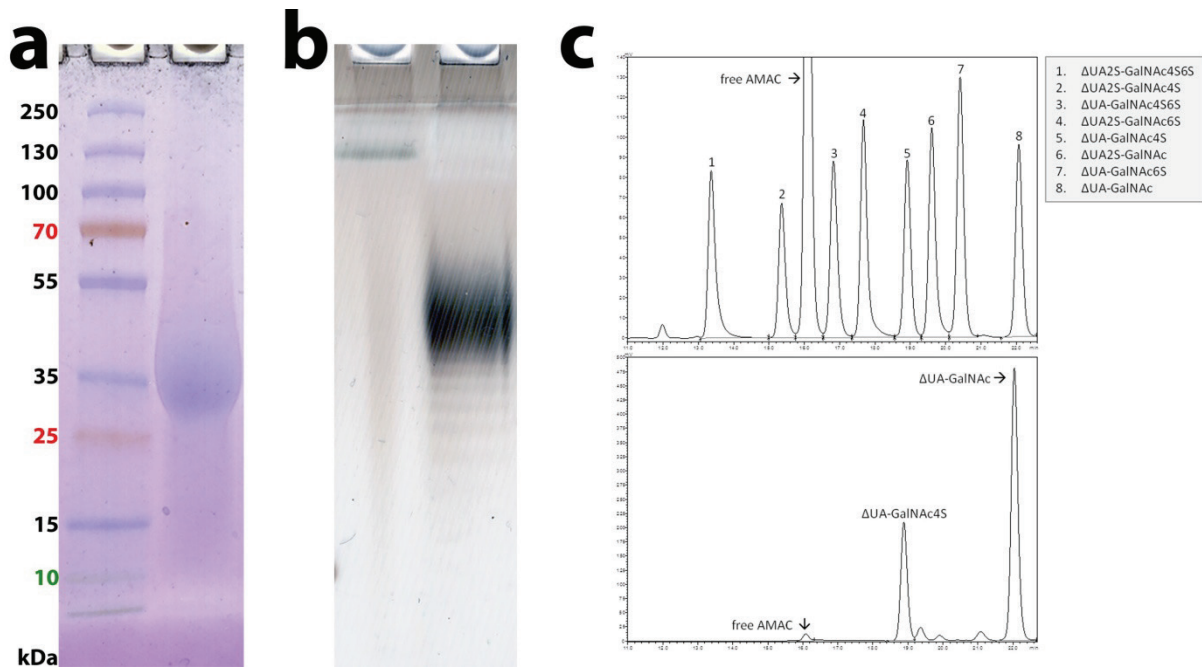

**Supplementary Fig. 2.**

**Gel filtration of end-labeled, fragmented chondroitin sulfate derived from bikunin.**

Chondroitin sulfate (~260 µg) derived from bikunin was end-labeled with azidoaniline, treated with chondroitinase AC-II (20 and 60 min combined), and fractionated by FPLC using a Biogel P-6 column. Fractions (2 ml) were collected, lyophilized, subjected to 30% polyacrylamide gel electrophoresis and visualized by incubation with DBCO-IR Dye680RD<sup>®</sup>. Note that the separation on PAGE is in accordance with the separation on gel filtration column, except for the smallest fragment (arrow) which co-migrates with the fragment obtained by exhaustive digestion with chondroitinase AC-II (lane labeled "60' ACII-ase"), and likely represents the linker region. A selected number of fractions are shown. Note that the fractions A8-B6 and B11-D1 are of two separate gels.

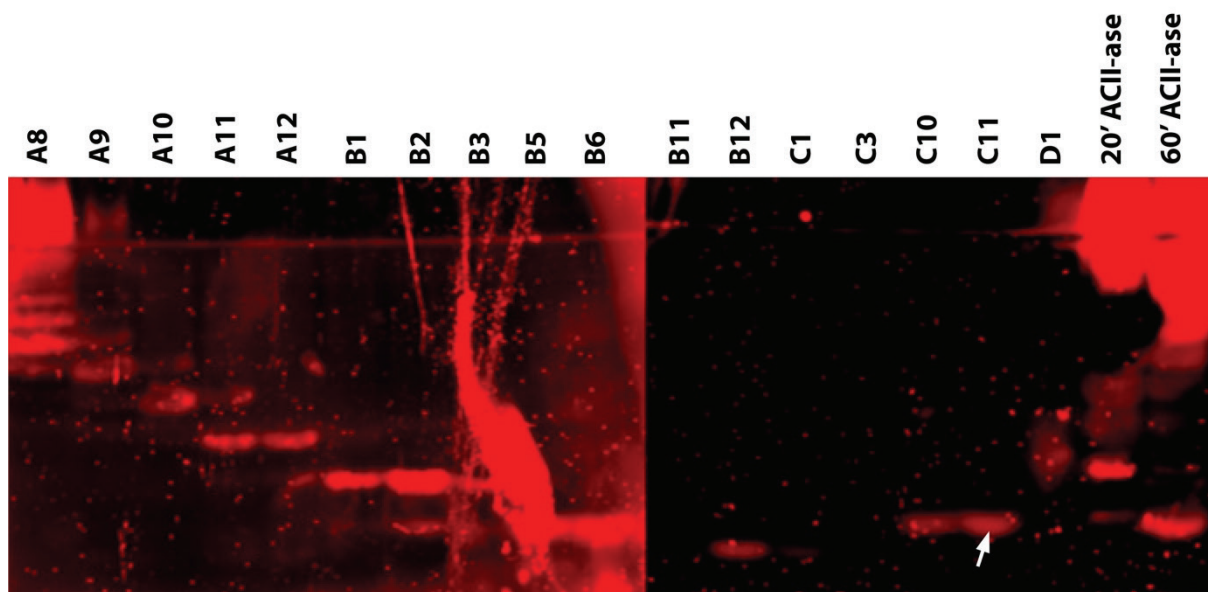

Supplement: 41598_2017_15009_MOESM1_ESM.pdf [file 41598_2017_15009_MOESM1_ESM.pdf]
